# Supplementary material for: Synergistic inflammatory signaling by cGAS may be involved in the development of atherosclerosis
Source: publisher site journal article supplement (doi:10.18632/aging.202491), 2021-02-11
Supplement: Supplementary file [file aging-v13i4-202491-supplementary-material-SD1.pdf]

## SUPPLEMENTARY FIGURE

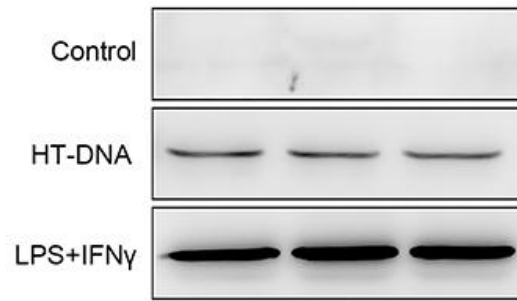

**Supplementary Figure 1. cGAS may be secreted extracellularly.** RAW264.7 cells were incubated for 12 h with either HT-DNA (8  $\mu$ g/mL), or LPS (10 ng/mL) plus IFN $\gamma$  (20 ng/ mL). The protein expression of cGAS in the culture supernatant was detected by western blotting (standardized at 60 $\mu$ g protein per sample). HT-DNA, deoxyribonucleic acid sodium salt from herring testes.
